# Supplementary material for: Lack of Microbial Diversity in an Extreme Mars Analog Setting: Poás Volcano, Costa Rica
Source: PubMed Central journal article supplement — Astrobiology. 2018 Jul 1;18(7):923–33. doi: 10.1089/ast.2017.1719 (PMC6067093; doi:10.1089/ast.2017.1719), 2018-07-01
Supplement: Supp_Data.pdf [file Supp_Data.pdf]

SUPPLEMENTARY MATERIAL

Lack of microbial diversity in an extreme Mars analog setting: Poás volcano, Costa Rica

Brian M. Hynek, Karyn L. Rogers, Monique Antunovich, Geoffroy Avaré, Guillermo E. Alvarado

*ASTROBIOLOGY*

Table S1. Distribution and taxonomy of OTUs obtained from Borinquen Hot Springs source pool (Rincón de la Vieja volcano). Only OTUs with > 0.2% of the total reads are included. We attribute the occurrence of trace amounts of *Lactobacillus* to external contamination.

| OTU ID   | # Quality Controlled Reads | % of Total Reads | Taxonomy (family/genus)            | BLAST Alignment Results                       |             |             |                   |
|----------|----------------------------|------------------|------------------------------------|-----------------------------------------------|-------------|-------------|-------------------|
|          |                            |                  |                                    | Type Strain of Top Match                      | Accession # | Sequence ID | Sequence Coverage |
| OTU 59   | 17288                      | 96.12            | Thermoproteaceae/<br>Pyrobaculum   | Thermoproteus thermophilus strain CBA1502 16S | NR 136789   | 99.21       | 100               |
| OTU 802  | 194                        | 1.08             | Thermoproteaceae/<br>NA            | Vulcanisaeta souniana strain IC-059           | NR 028628   | 98.81       | 100               |
| OTU 713  | 88                         | 0.49             | Lactobacillaceae/<br>Lactobacillus | Lactobacillus crispatus strain DSM 20584      | NR 119274   | 100         | 100               |
| OTU 2685 | 53                         | 0.29             | Sulfolobaceae/NA                   | Sulfolobus tengchongensis strain RT8-4        | NR 115150   | 93.28       | 100               |
| OTU 2167 | 41                         | 0.23             | Lactobacillaceae/<br>Lactobacillus | Lactobacillus iners strain DSM 13335          | NR 036982   | 100         | 99                |

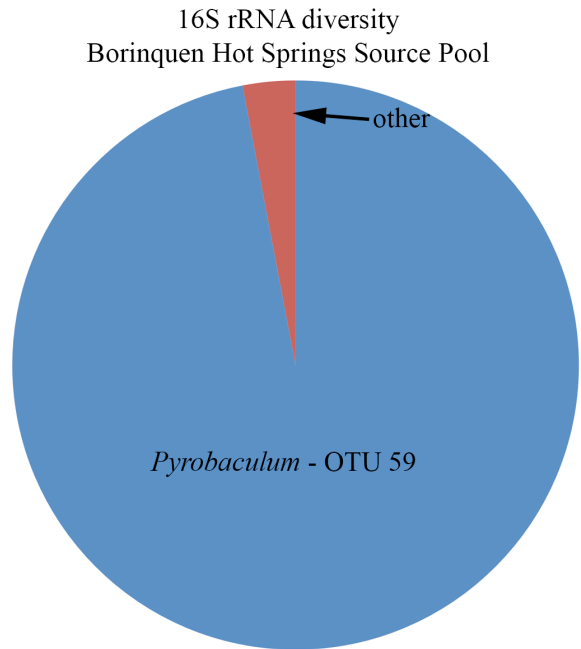

Figure S1. Bacterial and Archaeal diversity at Borinquen Hot Springs source pool, Rincón de la Vieja volcano, Costa Rica.

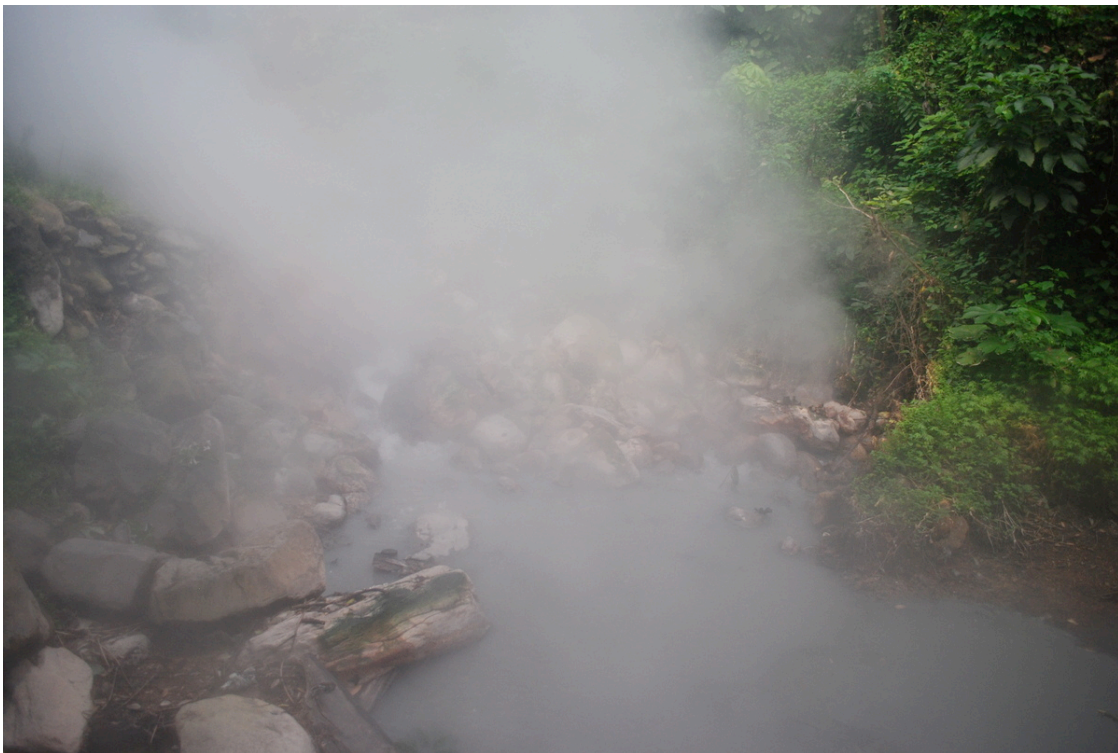

Figure S2. Sampling location at Borinquen Hot Springs source pool, Rincón de la Vieja volcano, Costa Rica.

Sequence reads for Laguna Caliente and Borinquen Hot Springs:

**Laguna Caliente, Poás volcano:**

>OTU\_63

TACGAAGGGGGCTAGCGTTGCTCGGAATGACTGGGCGTAAAGGGCGCGTAGGCGGC  
TTACATAGTTAGGCGTGAAATTCCTGGGCTCAACCTGGGGACTGCGTCTAATACATG  
TAGGCTTGAGTGTGAAAGAGGGTCGTGGAATTTCCAGTGTAGAGGTGAAATTCGTA  
GATATTGAAAGAACACCGGTGGCGAAGGCGGCGACCTGGTTCATTACTGACGCTG  
AGGCGCGAAAGCGTGGGGAGCAAACAGG

>OTU\_2111

TACGAAGGGGGCTAGCGTTGCTCGGAATGACTGGGCGTAAAGGGCGCGTAGGCGGA  
CTGCACAGTCAGGCGTGAAATTCCTGGGCTTAACCTGGGGACTGCGTCTGAGACGTG  
TGATCTAGAGTGAGGAAGAGGGTCGTGGAATTTCCAGTGTAGAGGTGAAATTCGTA  
GATATTGAAAGAACACCGGTGGCGAAGGCGGCGACCTGGTCCTTGACTGACGCTG  
AGGCGCGAAAGCGTGGGGAGCAAACAGG

>OTU\_214

TACGAGGGGGCAAGCGTTGTTCCGAATTATTGGGCGTAAAGGGTGCCTAGGCGGT  
TTGATAAGTCATCTGTGAAATCTATGGGCTCAACCCATAGTCTGCAGGCGAAACTGT  
CGGGCTTGAGTATGGGAGAGGTGAGTGGAAATTTCCGGTGTAGCGGTGAAATGCGTA  
GATATCGGAAGGAACACCTGTGGCGAAAGCGGCTCACTGGACCATTACTGACGCTG  
ATGCACGAAAGCTAGGGGAGCAAACAGG

>OTU\_5708

TACGAAGGGGGCTAGCGTTGCTCGGAATGACTGGGCGTAAAGGGCGCGTAGGCGGC  
TCATACAGTCAGGCGTGAAATTCCTGGGCTCAACCTGGGGACTGCGTCTGATACGTG  
TGGGCTTGAGTGTGAAAGAGGGTCGTGGAATTTCCAGTGTAGAGGTGAAATTCGTA  
GATATTGAAAGAACACCGGTGGCGAAGGCGGCGACCTGGTTCATGACTGACGCTG  
AGGCGCGAAAGCGTGGGGAGCAAACAGG

>OTU\_2941

TACGTAGGGAGCAAGCGTTGTCCGATTTATTGGGCGTAAAGAGCTCGTAGGCGGC  
TTAGATAGTCGGATGTTAAACCCCTAGGCTTAACCTAGGGCAGCCATTCGATACTAC  
TATGGCTAGAGTTCGGTAGGGGATTGTGGAATTTCCGGTGTAGCGGTGAAATGCGC  
AGATATCGGGAGGAACACCAATGGCGAAGGCAGCAATCTGGGCCGATACTGACGCT  
GAGGAGCGAAAGCGTGGGGAGCAAACAGG

**Borinquen Hot Springs source pool, Rincón de la Vieja volcano:**

>OTU\_59

TACCAGCCCCGCGAGTGGTCAGGGTGATTACTGGGCTTAAAGCGCCCCGTAGCCGGC  
CCGGCAAGTCGCTCCTGAAATCCCCGGGCTCAACCCGGGGGCTGGGGGCGATACTG  
CCGGGCTAGGGGGCGGGAGAGGCCGCCGGTACTCCGGGGGTAGGGGGCGAAATCCG  
ATAATCCCCGGAGGACCACCAGTGGCGAAAGCGGGCGGCCAGAACGCGCCCCGACG  
GTGAGGGGGCGAAAGCCGGGGGAGCAAAGGGG

>OTU\_802

TACCAGCCCCGCGAGTGGTCGGGGTGCTTACTGGGCCTAAAGCGCCCCGTAGCCGGC  
CCGGTAAGTCGTCCCTGAAATCCACGGGCTCAACCCGTGGGCTGGGGACGAAACTG  
CCGGGCTTGGGGGCGGGAGAGGCCGAGGGTACTCCCGGGGTAGGGGGCGAAATCCG  
ATAATCCCCGGGAGGACCACCAGTGGCGAAGGCGCTCGGCTTGAACGCGCCCCGACGG  
TGAGGGGGCGAAAGCTGGGGGAGCAAAGGGG

>OTU\_713

TACGTAGGTGGCAAGCGTTGTCCGGATTTATTGGGCGTAAAGCGAGCGCAGGCCGGA  
AGAATAAGTCTGATGTGAAAGCCCTCGGCTTAACCGAGGAACTGCATCGGAAACTG  
TTTTTCTTGAGTGCAGAAGAGGAGAGTGGAACTCCATGTGTAGCGGTGGAATGCGTA  
GATATATGGAAGAACACCAGTGGCGAAGGCGGCTCTCTGGTCTGCAACTGACGCTG  
AGGCTCGAAAGCATGGGTAGCGAACAGG

>OTU\_2685

TACCAGCCCCGCGAGTGATCCGGGCGTTTATTGGGCTTAAAGCGCCCCGTAGCCGGCC  
CCGCAAGTCACCCCTTAAAGCCCCCGGCTCAACCGGGGAAATGGGGGTGATACTGC  
GGGGCTAGGGGGCGGGAGAGGCCGGCGGTACTCCCGGAGTAGGGGGCGAAATCCGT  
AGATCCCGGGAGGACCACCAGTGGCGAAAGCGGCCGGCTAGAACGCGCCCCGACGG  
TGAGGGGGCGAAAGCCGGGGCAGCAAAGGG

>OTU\_2167

TACGTAGGTGGCAAGCGTTGTCCGGATTTATTGGGCGTAAAGCGAGTGCAGGCCGGC  
TCGATAAGTCTGATGTGAAAGCCTTCGGCTCAACCGGAGAATTGCATCAGAAACTGT  
CGAGCTTGAGTACAGAAGAGGAGAGTGGAACTCCATGTGTAGCGGTGAAATGCGTA  
GATATATGGAAGAACACCGGTGGCGAAGGCGGCTCTCTGGTCTGTTACTGACGCTG  
AGGCTCGAAAGCATGGGTAGCGAACAGG
